# Supplementary material for: Circulating Macrophage Activation Markers Predict Transplant-Free Survival in Patients With Primary Sclerosing Cholangitis
Source: PubMed Central journal article supplement — Clin Transl Gastroenterol. 2021 Mar 1;12(3):e00315. doi: 10.14309/ctg.0000000000000315 (PMC7925135; doi:10.14309/ctg.0000000000000315), 2021-03-01

**Supplemental figure 1:** Functional form of sCD163 and sMR as well of logarithmic values of both variables.

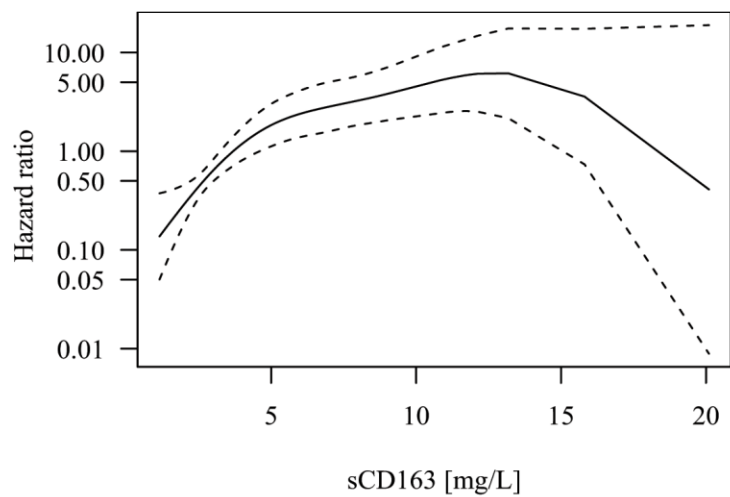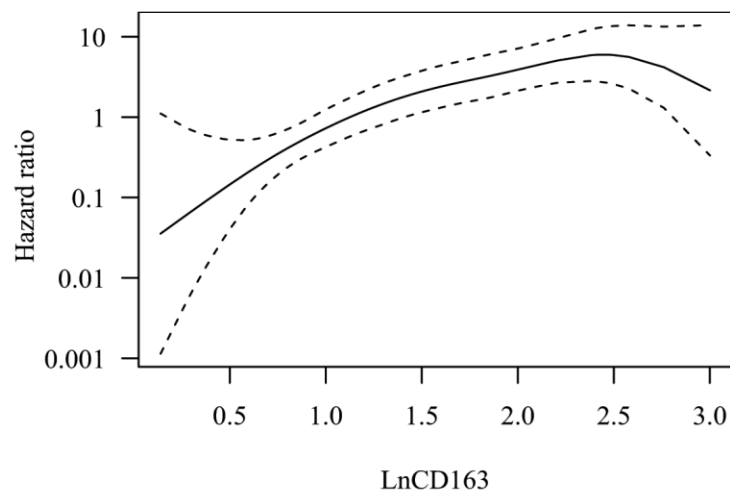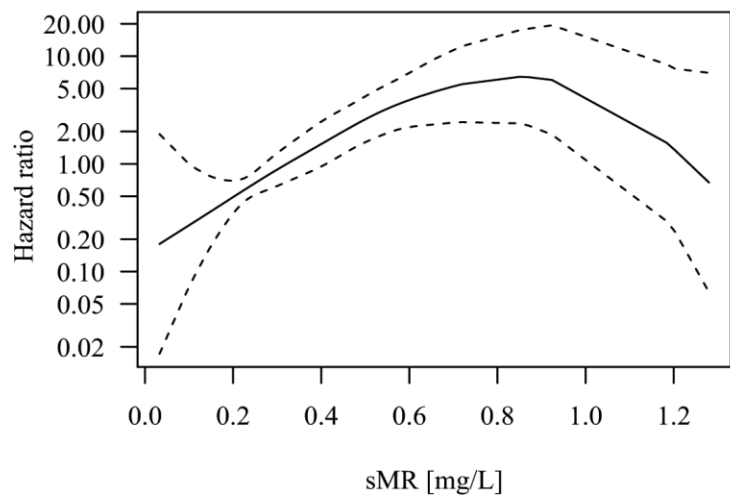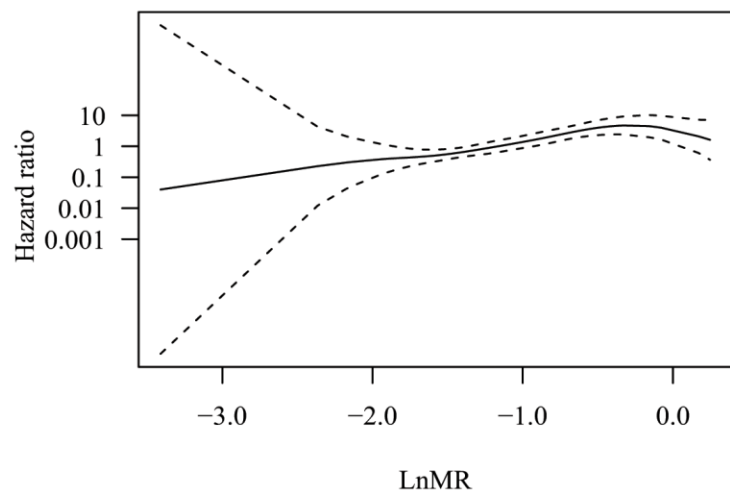

sCD163: soluble CD163, sMR: soluble mannose receptor.

**Supplemental figure 2:** Cumulative death or LT in the Oslo (dashed) and Helsinki (full line) cohorts.

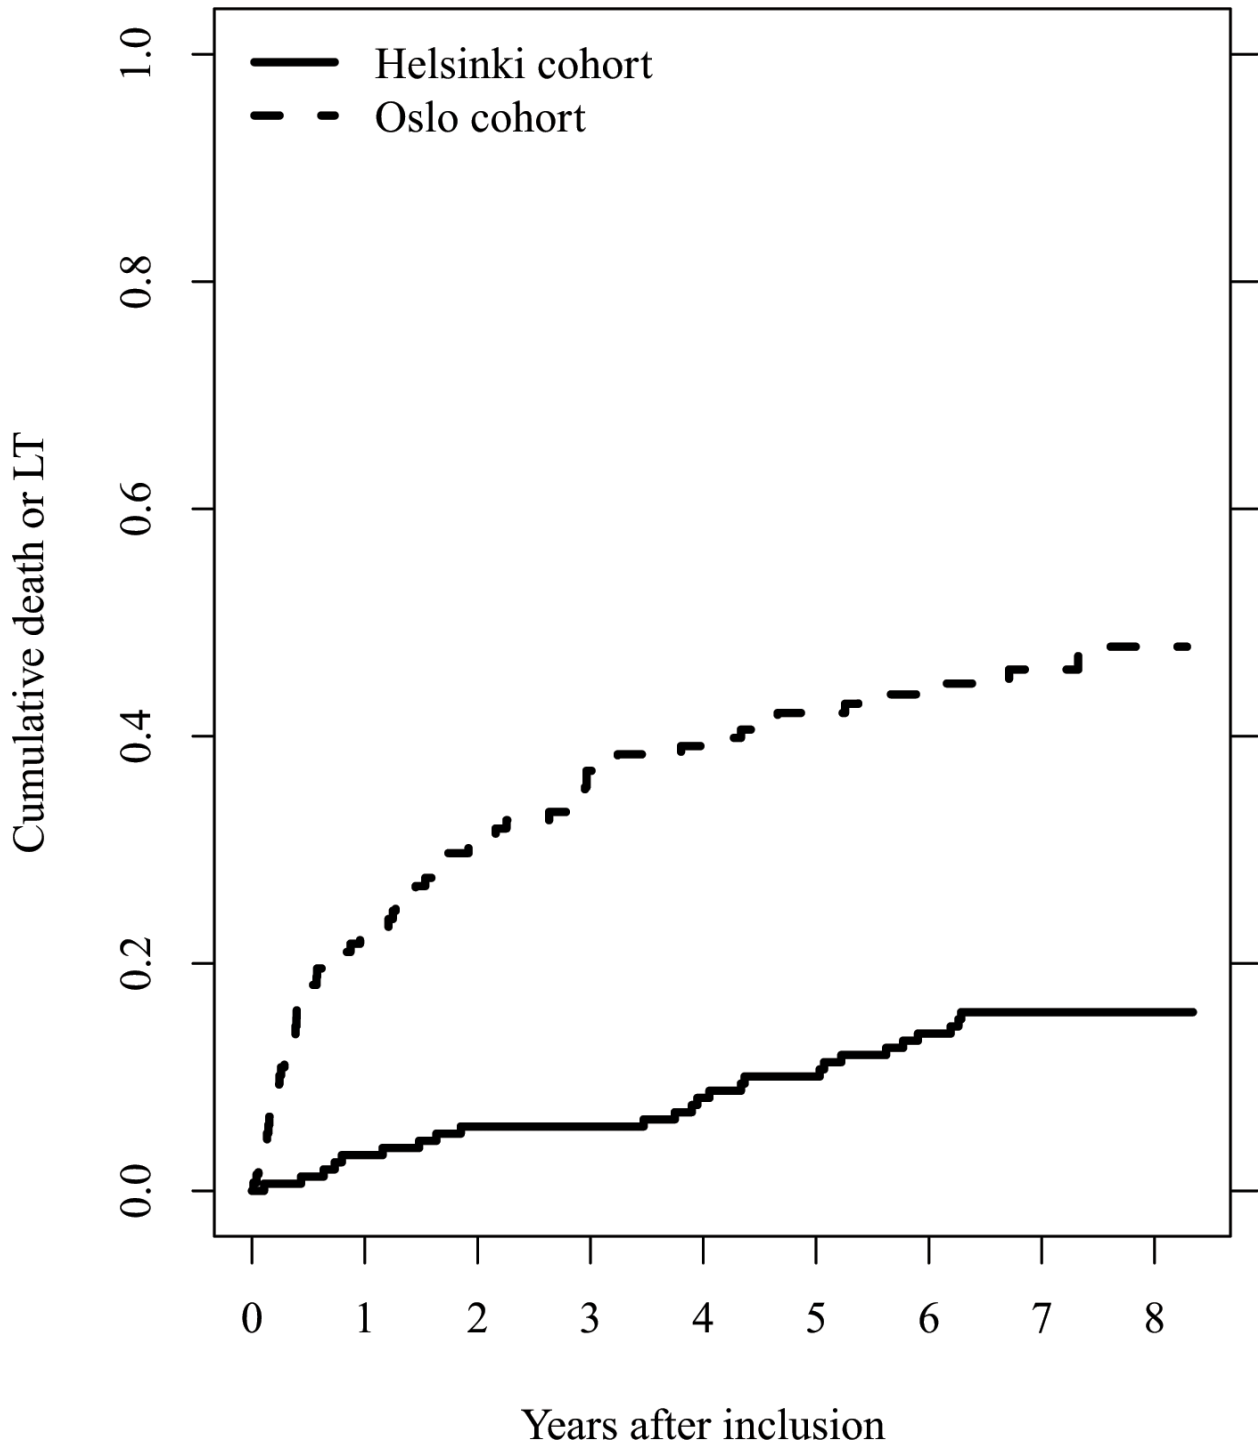

Supplement: ct9-12-e00315-s003.pdf [file ct9-12-e00315-s003.pdf]
